# Supplementary material for: Myristoylated CIL-7 regulates ciliary extracellular vesicle biogenesis
Source: PubMed Central journal article supplement — Mol Biol Cell. 2015 Aug 1;26(15):2823–32. doi: 10.1091/mbc.E15-01-0009 (PMC4571341; doi:10.1091/mbc.e15-01-0009), 2015-08-01

# Supplemental Materials

*Molecular Biology of the Cell*

Maguire et al.

## Supplemental Materials

### Supplemental Figure Legends:

**Supplemental Figure 1: CIL-7 has Invertebrate Homologs that All Share a Predicted Myristoylation Motif.** (A) The Cil phenotype of *cil-7(my16)* males could be rescued by injection (0.3 ng/ $\mu$ l) of a *cil-7* genomic clone. (B) The *tm5848* allele failed to complement the *my16* allele producing Cil males. (C) Maximum likelihood phylogenetic tree of protein sequences showing similarity to W03G9.7 (pBLAST <1e-5). Sequences showing the conserved myristoylation sequence (1-17aa) are marked with a triangle. (D) Conservation of the N-terminal glycine is exhibited in invertebrate homologs.

**Supplemental Figure 2: Endogenous PKD-2 Accumulated Abnormally at Ciliary Bases in Male-Specific CEM neurons of *cil-7(tm5848)* Males.** (A, D) An  $\alpha$ -PKD-2 antibody labeled cilia and ciliary bases and was excluded from the transition zone. (C, F) NPHP-4::GFP (driven by the *pkd-2* promoter) specifically marked CEM transition zones. (B, E) In the merged image, the majority of endogenous PKD-2 was found at the ciliary bases in wild-type and *cil-7(tm5848)* CEM cilia. In *cil-7*, the abnormal ciliary base accumulation of endogenous PKD-2 correlated with the abnormal accumulation of EVs in TEM images (Figure 3). yellow bracket – cilia; white bracket – cilia base; white asterisks – transition zone.

**Supplemental Figure 3: Endogenous LOV-1 and PKD-2::GFP Accumulated Abnormally in the Male-Specific Neurons of *cil-7(tm5848)* Males.** (A-C) PKD-2::GFP and  $\alpha$ -LOV-1 colocalized in CEM, RnB, and HOB neurons. (D-F) PKD-2::GFP and  $\alpha$ -LOV-1 abnormally accumulated at the ciliary bases of CEM, RnB, and HOB neurons. Yellow arrow – cilia; red arrow – dendrite; white arrow – cell body.

**Supplemental Figure 4: The Kinesin-3 KLP-6 is Required for Normal CIL-7 Localization.** (A) In wild-type CEM and IL2 neurons *Pcil-7::CIL-7::GFP* localized to cilia and along dendrites. (B) In *klp-6(my8)*, *CIL-7::GFP* abnormally localized to bases of cilia as nodules. (C,D) In wild type, *KLP-6::GFP* was found throughout the male sensory neurons and the shared IL2 neurons. In a *cil-7(tm5848)* mutant, the localization of *KLP-6::GFP* was not altered. Yellow arrow and yellow bracket – cilia; white bracket – cilia base; red arrow – dendrite; white arrow – cell body.

**A** *cil-7(my16); Ex[cil-7(+)]*

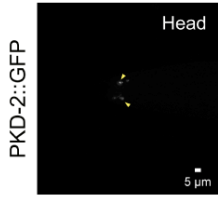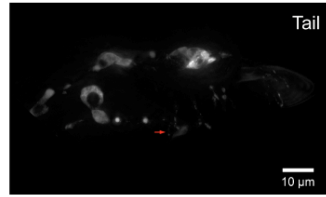

**B** *cil-7(my16)/cil-7(tm5848)*

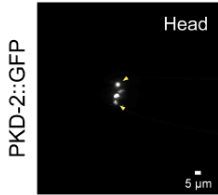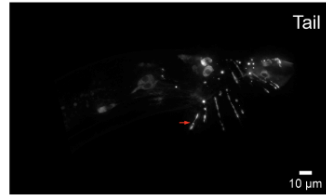

**D**

|                        |                     |       |                 |
|------------------------|---------------------|-------|-----------------|
| <i>C. elegans</i>      | w03G9.7 [NP_491493] | : MGS | SPSKRSDPVEDIRK  |
| <i>C. brenneri</i>     | [EGT36904]          | : MGS | SPSKRSDQVEIISK  |
| <i>D. melanogaster</i> | [NP_608879]         | : MGC | GSMDTQTNPVVTE   |
| <i>A. californica</i>  | [XP_005112171]      | : MGC | GNKSKAVDLSSGQ   |
| <i>S. purpuratus</i>   | [XP_003723782]      | : MGC | ASSAQGGPAYPKQ   |
| <i>S. kowalevskii</i>  | [XP_002736352]      | : MGC | AISSQDAGTSTQSKG |

\* \* . . \*

**C**

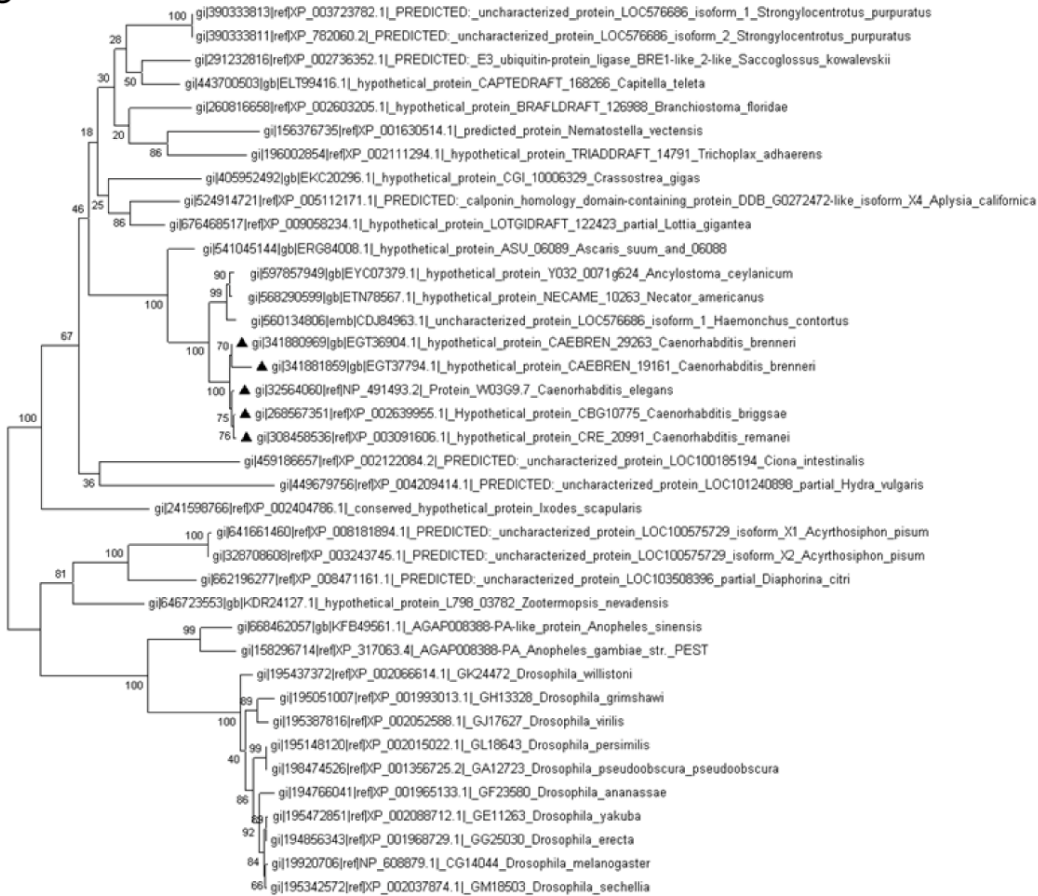

0.2

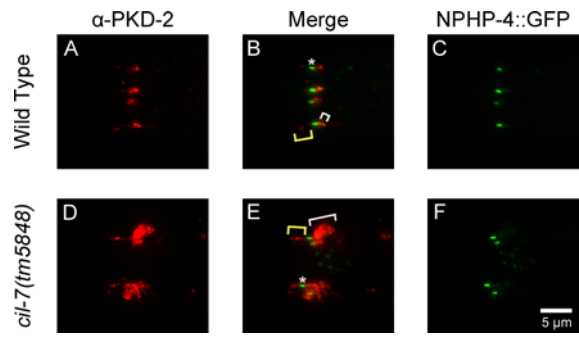

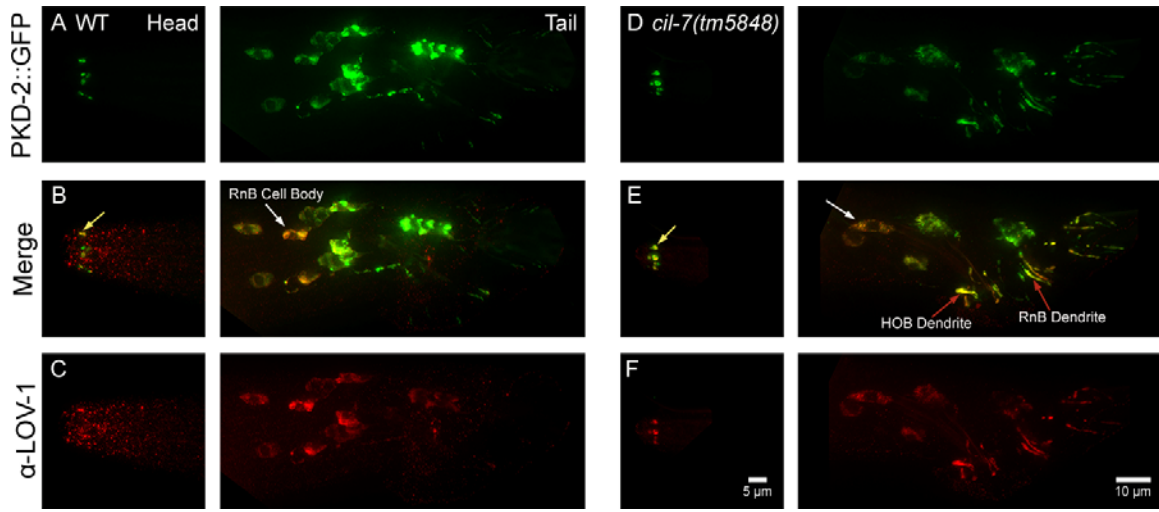

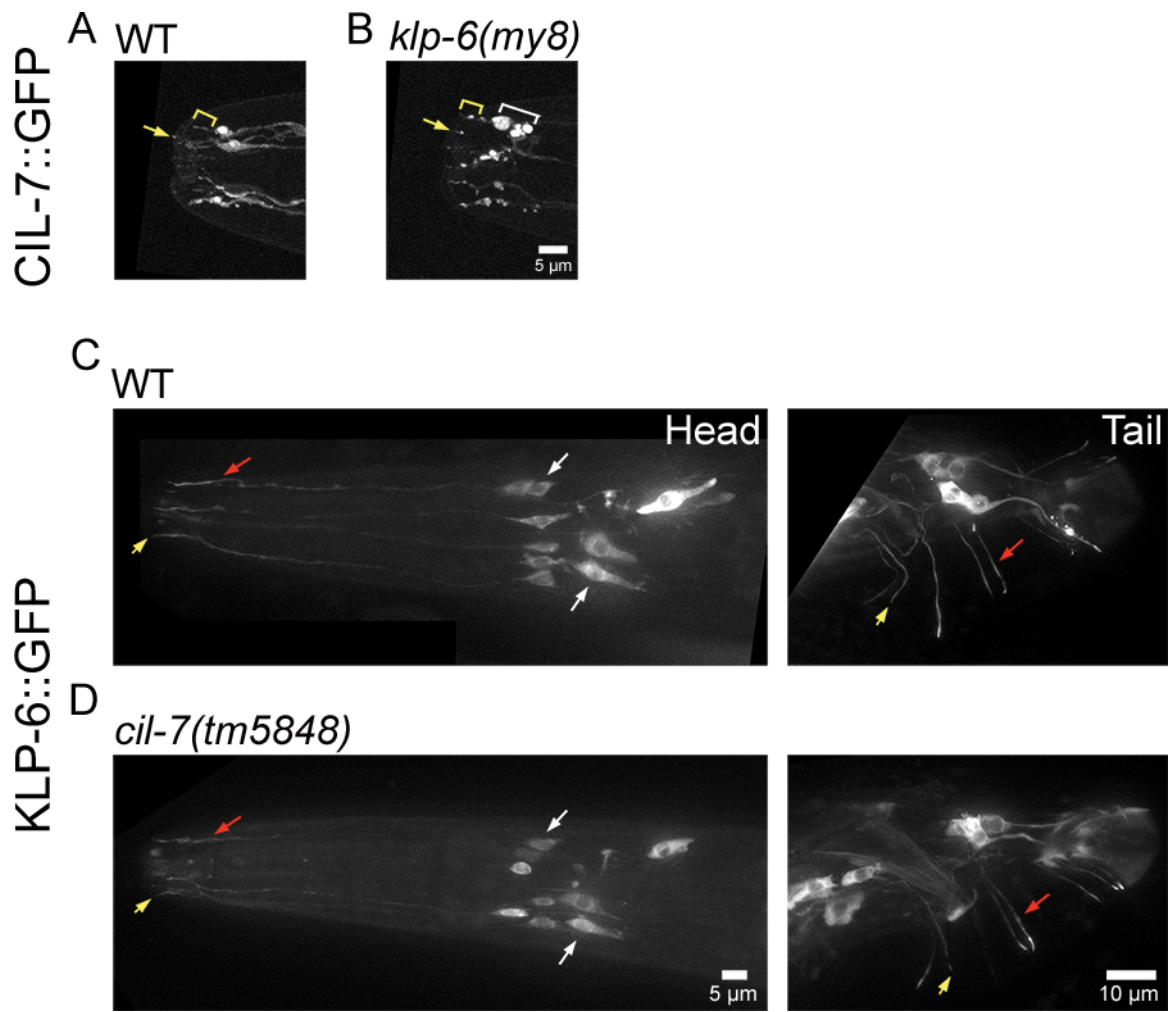

Supplement: supp_E15-01-0009v1_CombinedSupMats.pdf [file supp_E15-01-0009v1_CombinedSupMats.pdf]
